# Supplementary material for: Sodium-ion battery cathodes Na2FeP2O7 and Na2MnP2O7: diffusion behaviour for high rate performance
Source: Royal Society of Chemistry journal article supplement (doi:10.1039/c4ta02383h), 2014-01-01
Supplement: c4ta02383h1.pdf [file c4ta02383h1.pdf]

## Sodium-Ion Battery Cathodes $\text{Na}_2\text{FeP}_2\text{O}_7$ and $\text{Na}_2\text{MnP}_2\text{O}_7$ : Diffusion Behaviour for High Rate Performance

John M. Clark,<sup>a</sup> Prabeer Barpanda,<sup>b,c,d</sup> Atsuo Yamada,<sup>b,d</sup> and M. Saiful Islam<sup>a\*</sup>

### Supplementary Information

**Table S1.** Interatomic potentials and shell model parameters for  $\text{Li}_2\text{FeP}_2\text{O}_7$  and  $\text{Na}_2\text{MP}_2\text{O}_7$  ( $M = \text{Fe}, \text{Mn}$ ).

| Buckingham                         |             |                           |                          |
|------------------------------------|-------------|---------------------------|--------------------------|
| Interaction                        | $A$ (eV)    | $\rho$ (Å)                | $C$ (eV·Å <sup>6</sup> ) |
| Li <sup>+</sup> - O <sup>2-</sup>  | 632.1018    | 0.2906                    | 0.0                      |
| Na <sup>+</sup> - O <sup>2-</sup>  | 1497.830598 | 0.28743                   | 0.0                      |
| Fe <sup>2+</sup> - O <sup>2-</sup> | 1105.2409   | 0.3106                    | 0.0                      |
| Mn <sup>2+</sup> - O <sup>2-</sup> | 3248.3500   | 0.2690                    | 0.0                      |
| P <sup>5+</sup> - O <sup>2-</sup>  | 1029.0500   | 0.3470                    | 0.0                      |
| O <sup>2-</sup> - O <sup>2-</sup>  | 22764.3     | 0.1490                    | 44.53                    |
| Shell model                        |             |                           |                          |
| Species                            | $Y$ (e)     | $k$ (eV·Å <sup>-2</sup> ) |                          |
| Fe <sup>2+</sup>                   | 2.997       | 19.26                     |                          |
| Mn <sup>2+</sup>                   | 3.42        | 95.00                     |                          |
| O <sup>2-</sup>                    | -2.96       | 65.0                      |                          |
